# Supplementary material
Source: Elsevier journal article supplement (http://www.macglo.com/download/mmc2.pdf)
Supplement: mmc2 [file mmc2.pdf]

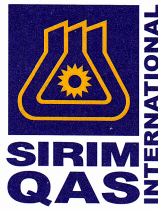

# CERTIFICATE

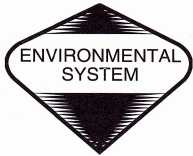

SIRIM

SIRIM QAS International hereby certifies that

**MACGLOTECH STEEL SERVICE CENTRE SDN. BHD.**  
(INCLUDING MACGLO STEEL SERVICE CENTRE SDN. BHD.)  
LOT 37901, BATU 6 1/4, JALAN KLINIK  
BUKIT KEMUNING, SEKSYEN 32  
40460 SHAH ALAM  
SELANGOR DARUL EHSAN  
MALAYSIA

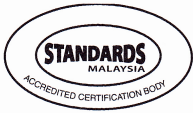

MS ISO/IEC 17021: 2006  
EMS 17122002 CB 02

has implemented an Environmental Management System complying with

**ISO 14001 : 2004**

*Environmental Management System - Requirements with Guidance for Use*

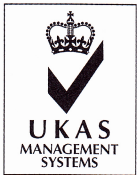

074

Scope of Certification

**MANUFACTURE OF STAMPED METAL PRODUCTS AND SLITTING,  
SHEARING AND CUTTING OF STEEL SHEET AND COILS.**

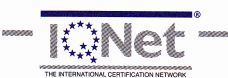

Issue date : 29 March 2011  
Validity period : 29 March 2011 - 23 March 2014  
Certification No. : ER 0580

SIRIM QAS International Sdn. Bhd.  
(Company No. 410334-X)  
1, Persiaran Dato' Menteri  
Section 2, P. O. Box 7035  
40911 Shah Alam  
Selangor Darul Ehsan  
MALAYSIA

Tel : 60-3-5544 6404  
Fax : 60-3-5544 6787

<http://www.sirim-qas.com.my>  
<http://www.malaysiancertified.com.my>

**Khalidah Mustafa**  
Managing Director  
SIRIM QAS International Sdn. Bhd.

**Dato' Ir. Hj. Yahaya Ahmad**  
Chairman  
SIRIM QAS International Sdn. Bhd.
